# Supplementary material for: Predicting Species Boundaries and Assessing Undescribed Diversity in Pneumocystis, an Obligate Lung Symbiont
Source: MDPI journal article supplement (doi:10.3390/jof8080799), 2022-07-29
Supplement: s1 [file s1]

**Supplementary Table 2** Support for delimitation hypotheses from BPP analysis

| <b>Delimitation Hypothesis</b> | <b><i>Rodents</i> Posterior Probability</b> | <b><i>Bats</i> Posterior Probability</b> | <b><i>Primates</i> Posterior Probability</b> |
|--------------------------------|---------------------------------------------|------------------------------------------|----------------------------------------------|
| ABGD                           | 0.000                                       | 0.000 <sup>b</sup>                       | 0.000                                        |
| GMYC                           | 0.000                                       | 0.000                                    | 0.000                                        |
| PTP                            | 0.000                                       | 0.009                                    | 0.899                                        |
| BPP                            | 0.993                                       | 0.902                                    | 0.899                                        |

<sup>b</sup>ABGD inferred one species that was paraphyletic with respect to the MCCT (*Felis catus* 1 + *Sus scrofa domesticus* 1) that could not be evaluated by BPP. The ABGD delimitation without this paraphyletic collapse received no support.
