# Supplementary material for: Predicting Species Boundaries and Assessing Undescribed Diversity in Pneumocystis, an Obligate Lung Symbiont
Source: MDPI journal article supplement (doi:10.3390/jof8080799), 2022-07-29
Supplement: s1 [file Supplementary_database_1.xlsx]

## Sheet: All Species
Total Species Sampled	240	/6495
Total Genera Sampled	142	/1342
Total Orders Sampled	15	/27
Species With Pneumocystis Genetic Data	129
Species With Microscopy ID Only	73
Negative Screening Results	43
Mammal Species Sampled	Positive for Pneumocystis	Genetic Sequence Available	Microscopy ID Only	Sequences Collected	Reference	Species Sampled in Genus	Total Species in Genus
$Acomys (Spiny mice)						4	21
^Acomys ngurui	Yes	Yes	No	COB, mtLSU	Petruzela et al. 2019 (https://doi.org/10.1016/j.meegid.2019.103934)
^Acomys muzei	Yes	Yes	No	DHFR, COB, mtLSU	Petruzela et al. 2019 (https://doi.org/10.1016/j.meegid.2019.103934)
^Acomys ignitus	No	No	No	NA	Petruzela et al. 2019 (https://doi.org/10.1016/j.meegid.2019.103934)
^Acomys wilsoni	No	No	No	NA	Petruzela et al. 2019 (https://doi.org/10.1016/j.meegid.2019.103934)
$Aethomys (Rock Mice)						3	9
^Aethomys hindei	No	No	No	NA	Petruzela et al. 2019 (https://doi.org/10.1016/j.meegid.2019.103934)
^Aethomys chrysophilus	Yes	Yes	No	DHFR, mtLSU, COB	Petruzela et al. 2019 (https://doi.org/10.1016/j.meegid.2019.103934)
^Aethomys kaiseri	Yes	Yes	No	mtLSU, COB	Petruzela et al. 2019 (https://doi.org/10.1016/j.meegid.2019.103934)
$Ailurus (Red panda)						1	2
^Ailurus fulgens	Yes	No	Yes	NA	Poelma 1975 (Pneumocystis carinii infections in zoo animals)
$Allactaga (Four and five-toed jerboas)						1	2
^Allactaga balikunica	Yes	Yes	No	DHPS	Unpublished, GenBank: KT020896, Martin-Alonso,A., Chabe,M. and Hugot,J.P.
$Allenopithecus (Allen's swamp monkey)						1	1
^Allenopithecus nigroviridis	Yes	Yes	No	mtLSU, DHPS	Demanche et al. 2001 (DOI: 10.1128/JCM.39.6.2126–2133.2001), Hugot et al. 2003 (DOI: 10.1080/10635150390250893)
$Allocricetulus (Asian hamsters)						1	2
^Allocricetulus curtatus	Yes	Yes	No	mtLSU, DHPS	Unpublished, GenBank: KT020896, Martin-Alonso,A., Chabe,M. and Hugot,J.P.
$Alouatta (Howler monkeys)						1	12
^Alouatta fusca	Yes	No	Yes	NA	Poelma 1975 (Pneumocystis carinii infections in zoo animals)
$Aotus (Owl monkeys)						2	11
^Aotus trivirgatus	Yes	No	Yes	NA	Chandler et al. 1976 (Pulmonary Pneumocystosis in Nonhuman primates)
^Aotus nancymaae	Yes	Yes	No	DHPS, DHFR	Ma et al. 2001 (Genetic Divergence of the Dihydrofolate Reductase and DihydropteroateSynthase Genes inPneumocystis cariniifrom 7 Different Host Species),
$Apodemus (Eurasian field mice)						5	22
^Apodemus agrarius	No	No	Yes	NA	Laakonen et al. 2005 (doi:10.1017/S003118200500931)
^Apodemus argenteus	Yes	No	Yes	NA	Shiota et al. 1986 (Prevalence of Pneumocystis carinii in Wild Rodents in japan)
^Apodemus flavicollis	Yes	Yes	No	mtLSU, mtSSU, ITS	Laakonen et al. 2005 (doi:10.1017/S003118200500931), Danesi et al. 2016 (http://dx.doi.org/10.1016/j.funbio.2015.08.019)
^Apodemus speciosus	Yes	No	Yes	NA	Shiota et al. 1986 (Prevalence of Pneumocystis carinii in Wild Rodents in japan)
^Apodemus sylvaticus	Yes	Yes	No	mtLSU, mtSSU	Mazars et al. 1997 (Detection of Pneumocystis in European wild animals), Demanche et al. 2015 ( doi: 10.1371/journal.pone.0120839)
$Apomys (Earthworm mice)						1	19
^Apomys banahao	Yes	Yes	No	mtLSU, mtSSU	Latinn et al. 2021 (https://doi.org/10.1016/j.meegid.2021.104978)
$Artibeus (Neotropical fruit bats)						3	11
^Artibeus fimbriatus	Yes	No	No	Amplified mtLSU but not sequenced	Sanches et al. 2009 (http://dx.doi.org/10.1590/S0100-736X2009000600005)
^Artibeus hirsutus	Yes	Yes	No	mtLSU, mtSSU	Akbar et al. 2012 (DOI: 10.1128/AEM.01791-12)
^Artibeus lituratus	No	No	No	Amplified MSG but not sequenced	Sanches et al, 2013 (http://dx.doi.org/10.1016/j.mycmed.2012.11.002)
$Arvicola (Water voles)						1	4
^Arvicola terrestris	Yes	No	Yes	NA	Goyot et al. 1986 (Arvicola terrestris, Linnaeus 1758, a reservour of Pneumocystis sp.)
$Ateles (Spider monkeys)						1	7
^Ateles belzebuth	Yes	No	Yes	NA	Poelma 1975 (Pneumocystis carinii infections in zoo animals)
$Atlantoxerus (Barbary ground squirrel)
^Atlantoxerus getulus	Yes	Yes	No	mtLSU, DHPS	Unpublished, GenBank: KT020896, Martin-Alonso,A., Chabe,M. and Hugot,J.P.	1	1
$Bandicota (Bandicoot rats)						2	3
^Bandicota indica	Yes	Yes	No	mtLSU, mtSSU	Latinne et al. 2018 (https://doi.org/10.1017/ S0031182017001883)
^Bandicota savilei	Yes	Yes	No	mtLSU, mtSSU	Latinne et al. 2018 (https://doi.org/10.1017/ S0031182017001883)
$Berylmys (White-toothed rats)						2	4
^Berylmys berdmorei	Yes	Yes	No	mtLSU, mtSSU	Latinne et al. 2018 (https://doi.org/10.1017/ S0031182017001883)
^Berylmys bowersi	Yes	Yes	No	mtLSU, mtSSU	Latinne et al. 2018 (https://doi.org/10.1017/ S0031182017001883)
$Blarina (Short-tailed shrews)						1	5
^Blarina brevicauda	No	No	Yes	NA	Laakonen et al. 1997 (Lung parasites of shrews from Pennsylvania)
$Bos (Cattle)						1	11
^Bos taurus	Yes	No	Yes	NA	Settnes and Henrickson 1989 (Pneumocystis carinii in large domestic animals in Denmark)
$Bradypus (Three-toed sloths)						2	4
^Bradypus tridactylus	Yes	No	Yes	NA	Poelma 1975 (Pneumocystis carinii infections in zoo animals), Lainson and Shaw 1975 (Pneumocystis and Histpolasma infections in wild animals from the amazon region of brazil)
^Bradypus variegatus	Yes	No	Yes	NA	Yonushonis et al. 1986 (Infection of a three-toed sloth by a Pneumocystis-like organism in Panama)
$Callimico (Goeldi's marmoset)						1	1
^Callimico goeldii	Yes	Yes	No	mtLSU, mtSSU, DHPS	Demanche et al. 2001 (DOI: 10.1128/JCM.39.6.2126–2133.2001), Hugot et al. 2003 (DOI: 10.1080/10635150390250893)
$Callithrix (Marmosets/Tamarins)						4	6
^Callithrix aurita	Yes	No	Yes	NA	Poelma 1975 (Pneumocystis carinii infections in zoo animals)
^Callithrix geoffroyi	Yes	Yes	No	mtLSU, mtSSU, DHPS	Demanche et al. 2001 (DOI: 10.1128/JCM.39.6.2126–2133.2001), Hugot et al. 2003 (DOI: 10.1080/10635150390250893)
^Callithrix jacchus	Yes	Yes	No	mtLSU, mtSSU	Demanche et al. 2001 (DOI: 10.1128/JCM.39.6.2126–2133.2001), Hugot et al. 2003 (DOI: 10.1080/10635150390250893)
^Callithrix penicillata	Yes	No	Yes	NA	Chagas 1909
$Callosciurus (Beautiful squirrels)						1	15
^Callosciurus finlaysonii	Yes	Yes	No	mtLSU, mtSSU	Danesi et al. 2018 (DOI: 10.1177/1040638718797379)
$Canis (Dogs)						1	8
^Canis lupus familiaris	Yes	Yes	No	Genome in prep	Kovacs group in prep
$Cannomys (Lesser bamboo rat)						1	1
^Cannomys badius	Yes	Yes	No	mtLSU, mtSSU	Latinne et al. 2018 (https://doi.org/10.1017/ S0031182017001883)
$Capra (Goats)						1	10
^Capra aegagrus hircus	Yes	Yes	No	mtLSU	McConnell et al. 1971 (Pneumocystosis in a domestic goat), Sakakibara et al. 2012 (doi: 10.1292/jv ms.12- 0465)
$Capreolus (Roe deer)						1	2
^Capreolus capreolus	Yes	No	Yes	NA	Settnes et al. 1986 (Pneumocystis carinii found in lungs of freeliving animals in denmark)
$Carollia (Short-tailed fruit bats)						1	8
^Carollia perspicillata	No	No	No	NA	Akbar et al. 2012 (doi: 10.1128/AEM.01791-12)
$Cavia (Guinea pigs)						1	7
^Cavia porcellus	Yes	No	Yes	NA	Chagas 1909
$Cercopithecus (Guenons)						3	19
^Cercopithecus hamlyni	Yes	Yes	No	mtLSU, mtSSU	Demanche et al. 2001 (DOI: 10.1128/JCM.39.6.2126–2133.2001), Hugot et al. 2003 (DOI: 10.1080/10635150390250893)
^Cercopithecus lhoesti	Yes	Yes	No	mtLSU	Guillot et al. 2004 (Phylogenetic relationships amongPneumocystis from Asian macaques inferred from mitochondrial rRNA sequences)
^Cercopithecus nictitans	Yes	Yes	No	mtLSU, mtSSU	Demanche et al. 2001 (DOI: 10.1128/JCM.39.6.2126–2133.2001), Hugot et al. 2003 (DOI: 10.1080/10635150390250893)
$Chaetodipus (Pocket mice)						1	20
^Chaetodipus californicus	Yes	No	Yes	NA	Laakonen et al. 2001 (https://doi.org/10.7589/0090-3558-37.2.408)
$Choloepus (Two-toed sloths)						1	2
^Choloepus didactylus	Yes	No	Yes	NA	Lainson and Shaw 1975 (Pneumocystis and Histpolasma infections in wild animals from the amazon region of brazil)
$Clethrionomys (Red-backed voles)						2	5
^Clethrionomys glareolus	Yes	No	Yes	NA	Sukura et al. 1992 (Pneumocystis carinii in coricosteroid-treated voles…)
^Clethrionomys rufocanus	Yes	No	Yes	NA
$Cricetulus (Ratlike Hamsters)						3	3
^Cricetulus longicaudatus	Yes	Yes	No	mtLSU, DHPS	Unpublished, GenBank: KT020896, Martin-Alonso,A., Chabe,M. and Hugot,J.P.
^Cricetulus migratorius	Yes	Yes	No	mtLSU, DHPS	Unpublished, GenBank: KT020896, Martin-Alonso,A., Chabe,M. and Hugot,J.P.
^Cricetulus sokolovi	Yes	Yes	No	mtLSU	Unpublished, GenBank: KT020896, Martin-Alonso,A., Chabe,M. and Hugot,J.P. NA
$Ctenodactylus (gundis)						1	2
^Ctenodactylus gundi	Yes	Yes	No	mtLSU, mtSSU	Latinne et al. 2018 (https://doi.org/10.1017/ S0031182017001883)
$Crocidura (White-toothed shrews)						1	219
^Crocidura sualveolens	No	No	Yes	NA	Sebek and Rosicky 1967 (The finding of Pneumocystis carinii in shrews)
$Cuniculus (Paca)						1	2
^Cuniculus paca	Yes	Yes	No	mtLSU, mtSSU	Guillot et al. 2001 (Parallel Phylogenies of Pneumocystis Species and their Mammalian Hosts)
$Cynomys (Prairie dogs)						1	5
^Cynomys ludovicianus	Yes	Yes	No	Mitogenome	Ma et al. In Prep
$Desmodus (Vampire bats)						1	1
^Desmodus rotundus	Yes	No	No	Amplified mtLSU but not sequenced	Sanches et al. 2009 (http://dx.doi.org/10.1590/S0100-736X2009000600005)
$Diaemus (White-winged vampire bat)						1	1
^Diaemus youngii	No	No	No	Amplified MSG but not sequenced	Sanches et al, 2013 (http://dx.doi.org/10.1016/j.mycmed.2012.11.002)
$Didelphis (American opossums)						1	6
^Didelphis virginianus	No	No	No	NA	Babb-Biernacki unpublished results
$Diphylla (Hairy-legged vampire bats)						1	1
^Diphylla ecaudata	Yes	No	No	Amplified mtLSU but not sequenced	Sanches et al. 2009 (http://dx.doi.org/10.1590/S0100-736X2009000600005)
$Eliomys (Garden dormice)						1	3
^Eliomys quercinus	Yes	Yes	No	mtLSU	Mazars et al. 1997 (Detection of Pneumocystis in European wild animals)
$Eptesicus (House bats)						2	26
^Eptesicus furinalis	Yes	No	No	Amplified MSG but not sequenced	Sanches et al, 2013 (http://dx.doi.org/10.1016/j.mycmed.2012.11.002)
^Eptesicus serotinus	Yes	Yes	No	mtLSU, mtSSU	Akbar et al. 2012 (doi: 10.1128/AEM.01791-12)
$Equus (Horses)						1	9
^Equus ferus caballus	Yes	Yes	No	mtLSU	Peters et al. 1994 (Pneumocystis caninii Pneumonia in Thoroughbred Foals: Identification of a Genetically Distinct Organism by DNA Amplification)
$Erinaceus (Hedgehogs)						1	4
^Erinaceus europaeus	No	No	Yes	NA	Settnes et al. 1986 (Pneumocystis carinii found in lungs of freeliving animals in denmark)
$Eulemur (True lemurs)						1	12
^Eulemur macaco	Yes	Yes	No	mtLSU, mtSSU	Demanche et al. 2001 (DOI: 10.1128/JCM.39.6.2126–2133.2001), Hugot et al. 2003 (DOI: 10.1080/10635150390250893)
$Eumops (Mastiff bats)						1	17
^Eumops glaucinus	No	No	No	Amplified MSG but no sequence	Sanches et al, 2013 (http://dx.doi.org/10.1016/j.mycmed.2012.11.002)
$Felis (Small cats)						1	7
^Felis catus	Yes	Yes	No	mtLSU, mtSSU	Danesi et al. 2018 (doi: 10.1093/mmy/myy139)
$Funambulus (Palm squirrels)						1	6
^Funambulus palmarum	Yes	No	Yes	NA	Poelma 1975 (Pneumocystis carinii infections in zoo animals)
$Galago (Bush babies)						2	4
^Galago senegalensis	Yes	No	Yes	NA	Poelma 1975 (Pneumocystis carinii infections in zoo animals)
^Galago demidovii	Yes	No	Yes	NA	Poelma 1975 (Pneumocystis carinii infections in zoo animals)
$Galictis (Grisons)						1	2
^Galictis vittata	Yes	Yes	No	mtLSU (not on genbank), mtSSU (not on genbank)	Guillot et al. 2001 (Parallel Phylogenies of Pneumocystis Species and their Mammalian Hosts)
$Gerbilliscus (Gerbils)						1	18
^Gerbilliscus vicinus	Yes	Yes	No	mtLSU, DHFR, COB	Petruzela et al. 2019 (https://doi.org/10.1016/j.meegid.2019.103934)
$Glossophaga (Long-tongued bats)						1	9
^Glossophaga soricina	Yes	Yes	No	mtLSU, mtSSU	Akbar et al. 2012 (doi: 10.1128/AEM.01791-12)
$Grammomys (Thicket rats)						1	14
^Grammomys surdaster	Yes	Yes	No	mtLSU, COB	Petruzela et al. 2019 (https://doi.org/10.1016/j.meegid.2019.103934)
$Graphiurus (African dormice)						2	15
^Graphiurus murinus	Yes	Yes	No	mtLSU, COB	Petruzela et al. 2019 (https://doi.org/10.1016/j.meegid.2019.103934)
^Graphiurus sp. indet.	Yes	Yes	No	mtLSU, COB	Petruzela et al. 2019 (https://doi.org/10.1016/j.meegid.2019.103934)
$Hapalemur (Gentle lemurs)						1	5
^Hapalemur griseus	Yes	Yes	No	mtLSU	Demanche et al. 2001 (DOI: 10.1128/JCM.39.6.2126–2133.2001), Hugot et al. 2003 (DOI: 10.1080/10635150390250893)
$Heliophobius (Silvery mole rat)						1	1
^Heliophobius argenteocinereus	Yes	Yes	No	mtLSU, COB	Petruzela et al. 2019 (https://doi.org/10.1016/j.meegid.2019.103934)
$Hippotragus (Antelopes)						1	2
^Hippotragus niger	Yes	No	Yes	NA	Wilson et al. 1974 (Observations on mortality rates and disease in roan and sable antelope on nature reserves in the transvaal)
$Histiotus (Big-eared brown bats)						1	11
^Histiotus velatus	Yes	No	No	Amplified MSG but no sequence	Sanches et al, 2013 (http://dx.doi.org/10.1016/j.mycmed.2012.11.002)
$Homo (Humans)						1	1
^Homo sapiens	Yes	Yes	No	Genome	Various. Genome: Cisse et al. 2013 (doi: 10.1128/mBio.00428-12)
$Hylomyscus (African wood mice)						1	22
^Hylomyscus arcimontensis	Yes	Yes	No	COB, DHFR	Petruzela et al. 2019 (https://doi.org/10.1016/j.meegid.2019.103934)
$Lagothrix (Woolly monkeys)						1	2
^Lagothrix lagothricha	Yes	No	Yes	NA	Poelma 1975 (Pneumocystis carinii infections in zoo animals)
$Lasiurus (Hairy-tailed bats)						1	12
^Lasiurus blossevillii	Yes	No	No	Amplified MSG but no sequence	Sanches et al, 2013 (http://dx.doi.org/10.1016/j.mycmed.2012.11.002)
$Lemmus (True lemmings)						1	6
^Lemmus lemmus	No	No	Yes	NA	Laakonen et al. 1995 (Pneumocystis in arvicoline rodents…)
$Lemniscomys (Zebra mice)						2	11
^Lemniscomys striatus	Yes	Yes	No	COB	Petruzela et al. 2019 (https://doi.org/10.1016/j.meegid.2019.103934)
^Lemniscomys rosalia	Yes	Yes	No	mtLSU, COB	Petruzela et al. 2019 (https://doi.org/10.1016/j.meegid.2019.103934)
$Leopoldamys (Long-tailed giant rats)						3	9
^Leopoldamys herberti	Yes	Yes	No	mtLSU, mtSSU	Latinne et al. 2018 (https://doi.org/10.1017/ S0031182017001883)
^Leopoldamys neilli	Yes	Yes	No	mtLSU, mtSSU	Latinne et al. 2021 (https://doi.org/10.1016/j.meegid.2021.104978)
^Leopoldamys sabanus	Yes	Yes	No	mtLSU, mtSSU	Latinne et al. 2021 (https://doi.org/10.1016/j.meegid.2021.104978)
$Lepus (Jackrabbits)						2	32
^Lepus europaeus	Yes	Yes	No	mtSSU	Settnes et al. 1986 (Pneumocystis carinii found in lungs of freeliving animals in denmark), Laakkonen et al. 2006 (DOI:, 10.7589/0090-3558-42.4.780), Akbar et al. 2012 (doi: 10.1128/AEM.01791-12)
^Lepus timidus	Yes	No	Yes	NA	Laakkonen et al. 2006 (DOI: 10.7589/0090-3558-42.4.780)
$Lophuromys (Brush-furred mice)						2	34
^Lophuromys kilonzoi	Yes	Yes	No	mtLSU, COB	Petruzela et al. 2019 (https://doi.org/10.1016/j.meegid.2019.103934)
^Lophuromys makundii	Yes	Yes	No	mtLSU, COB	Petruzela et al. 2019 (https://doi.org/10.1016/j.meegid.2019.103934)
$Macaca (Macaques)						7	24
^Macaca arctoides	No	No	Yes	NA	Matsumoto et al. 197 (Pneumocystis infection in macaque monkeys)
^Macaca cyclopis	Yes	No	Yes	NA	Letvin et al. 1983 (Acquired immunodeficiency syndrome in a colony of macaque monkeys)
^Macaca fascicularis	Yes	Yes	No	mtLSU, mtSSU	Guillot et al. 2003 (doi:10.1016/j.ympev.2003.10.022), Demanche et al. 2001 (DOI: 10.1128/JCM.39.6.2126–2133.2001), Hugot et al. 2003 (DOI: 10.1080/10635150390250893)
^Macaca fuscata	Yes	No	Yes	NA	Matsumoto et al. 197 (Pneumocystis infection in macaque monkeys)
^Macaca mulatta	Yes	Yes	No	Genome	Genome: Kovacs group in prep.
^Macaca nemestrina	Yes	Yes	No	mtLSU, mtSSU (not on GenBank)	Demanche et al. 2001 (DOI: 10.1128/JCM.39.6.2126–2133.2001), Hugot et al. 2003 (DOI: 10.1080/10635150390250893)
^Macaca radiata	No	No	Yes	NA	Matsumoto et al. 197 (Pneumocystis infection in macaque monkeys)
$Macropus (Kangaroos)						1	2
^Macropus rufus	Yes	No	Yes	NA	Poelma 1975 (Pneumocystis carinii infections in zoo animals)
$Marmosa (Mouse opossums)						1	28
^Marmosa murina	Yes	Yes	No	mtLSU, mtSSU	Guillot et al. 2001 (Parallel Phylogenies of Pneumocystis Species and their Mammalian Hosts)
$Martes (Martens)						1	8
^Martes foina	No	No	Yes	NA	Settnes et al. 1986 (Pneumocystis carinii found in lungs of freeliving animals in denmark)
$Mastomys (Multimammate mice)						1	8
^Mastomys natalensis	Yes	Yes	No	mtLSU, COB, DHFR	Petruzela et al. 2019 (https://doi.org/10.1016/j.meegid.2019.103934)
$Maxomys (Spiny rats)						1	18
^Maxomys surifer	Yes	Yes	No	mtLSU, mtSSU	Latinne et al. 2018 (https://doi.org/10.1017/ S0031182017001883)
$Meles (Old world badgers)						1	4
^Meles meles	No	No	No	NA	Settnes et al. 1986 (Pneumocystis carinii found in lungs of freeliving animals in denmark), Danesi et al. 2015 (http://dx.doi.org/10.1016/j.funbio.2015.08.019)
$Melogale (Ferret-badgers)						1	6
^Melogale moschata	Yes	No	Yes	NA	Cross and Hung 1975 (Latent Pneumocystis carinii infections in some mammals from taipei hsien, taiwan)
$Meriones (Gerbils)						2	17
^Meriones meridianus	Yes	Yes	No	mtLSU, DHPS	Unpublished, GenBank: KT020896, Martin-Alonso,A., Chabe,M. and Hugot,J.P.
^Meriones unguiculatus	Yes	Yes	No	5.8S, ITS, 18S, mtLSU	Li et al. 2008 (doi: 10.1007/s11427-008-0057-1), Feng et al. 2010 (doi: oi: 10.1007/s11427-010-4074-5)
$Mesocricetus (Hamsters)						1	4
^Mesocricetus auratus	Yes	No	Yes	NA	Cho et al. 1999 (Karyotypes of Pneumocystis carinii derived from several mammals)
$Microcebus (Mouse lemurs)						1	25
^Microcebus murinus	Yes	Yes	No	mtLSU	Guillot et al. 2004 (Phylogenetic relationships amongPneumocystis from Asian macaques inferred from mitochondrial rRNA sequences)
$Microgale (shrew tenrecs)						1	21
^Microgale sp.	Yes	No	Yes	NA	Laakonen 1998 (Pneumocystis carinii in wildlife)
$Micromys (Harvest mice)						1	2
^Micromys minutus	Yes	No	No	NA	Laakonen et al. 2005 (doi:10.1017/S003118200500931)
$Microtus (Meadow voles)						8	58
^Microtus agrestis	Yes	Yes	No	mtLSU	Mazars et al. 1997 (Detection of Pneumocystis in European wild animals)
^Microtus arvalis	No	No	Yes	NA	Sebek and Rosicky 1967 (The finding of Pneumocystis carinii in shrews)
^Microtus californicus	Yes	No	Yes	NA	Laakonen et al. 2001 (https://doi.org/10.7589/0090-3558-37.2.408)
^Microtus gregalis	Yes	Yes	No	mtLSU, DHPS	Unpublished, GenBank: KT020896, Martin-Alonso,A., Chabe,M. and Hugot,J.P.
^Microtus montebelli	Yes	No	Yes	NA	Shiota et al. 1986 (Prevalence of Pneumocystis carinii in Wild Rodents in japan)
^Microtus multiplex	No	No	No	NA	Danesi et al. 2018 (DOI: 10.1177/1040638718797379)
^Microtus oeconomus	Yes	No	Yes	NA	Laakonen et al. 1995 (Pneumocystis in arvicoline rodents…)
^Microtus subterraneus	No	No	Yes	NA	Sebek and Rosicky 1967 (The finding of Pneumocystis carinii in shrews)
$Molossus (Free-tailed bats)						3	15
^Molossus molossus	Yes	No	No	Amplified mtLSU but not sequenced	Sanches et al. 2009 (http://dx.doi.org/10.1590/S0100-736X2009000600005)
^Molossus rufus	Yes	No	No	Amplified MSG but no sequence	Sanches et al, 2013 (http://dx.doi.org/10.1016/j.mycmed.2012.11.002)
^Molossus currentium	Yes	No	No	Amplified MSG but no sequence	Sanches et al, 2013 (http://dx.doi.org/10.1016/j.mycmed.2012.11.002)
$Mormoops (Ghost-faced bats)						1	2
^Mormoops megalophylla	No	No	No	NA	Akbar et al. 2012 (doi: 10.1128/AEM.01791-12)
$Mus (Mice)						7	42
^Mus caroli	Yes	Yes	No	mtLSU, mtSSU	Latinne et al. 2018 (https://doi.org/10.1017/ S0031182017001883)
^Mus cooki	Yes	Yes	No	mtLSU, mtSSU	Latinne et al. 2018 (https://doi.org/10.1017/ S0031182017001883)
^Mus cervicolor	Yes	Yes	No	mtLSU, mtSSU	Latinne et al. 2018 (https://doi.org/10.1017/ S0031182017001883)
^Mus minutoides	Yes	Yes	No	mtLSU, COB, DHFR	Petruzela et al. 2019 (https://doi.org/10.1016/j.meegid.2019.103934)
^Mus musculus	Yes	Yes	No	Genome	Genome: Ma et al. 2015 (doi: https://doi.org/10.1038/ncomms10740)
^Mus pahari	Yes	Yes	No	mtLSU, mtSSU	Latinne et al. 2021 (https://doi.org/10.1016/j.meegid.2021.104978)
^Mus triton	Yes	Yes	No	mtLSU, COB	Petruzela et al. 2019 (https://doi.org/10.1016/j.meegid.2019.103934)
$Muscardinus (Common dormouse)						1	1
^Muscardinus avellanarius	No	No	Yes	NA	Sebek and Rosicky 1967 (The finding of Pneumocystis carinii in shrews)
$Mustela (Weasels)						3	16
^Mustela putorius furo	Yes	Yes	No	mtLSU, mtSSU, nucRNA,TS, MSG, AROM,DHPS, DHFR	Aliouat-Denis et al. 2008 (https://doi.org/10.1016/j.meegid.2008.05.001)
^Mustela sibirica	No	No	Yes	NA	Yoshida and Ikai 1978 (Pneumocystis carinii pneumonia: epidemiology in Japan)
^Mustela nivalis	Yes	No	Yes	NA	Laakkonen et al. 1998 (Lung parasites of least weasels in Finland)
$Myocastor (Nutria)						1	1
^Myocastor coypus	Yes	Yes	No	mtLSU, mtSSU	Danesi et al. 2018 (DOI: 10.1177/1040638718797379)
$Myodes (Red-backed voles)						2	5
^Myodes glareolus	Yes	Yes	No	mtLSU, mtSSU, ITS	Danesi et al. 2018 (DOI: 10.1177/1040638718797379)
^Myodes smithii	No	No	Yes	NA	Shiota et al. 1986 (Prevalence of Pneumocystis carinii in Wild Rodents in japan)
$Myomyscus (African mice)						1	1
^Myomyscus brockmani (Ochromyscus)	Yes	Yes	No	mtLSU, COB, DHFR	Petruzela et al. 2019 (https://doi.org/10.1016/j.meegid.2019.103934)
$Myopus (Wood lemmings)						1	1
^Myopus schisticolor	No	No	Yes	NA	Laakkonen et al. 1995 (Pneumocystis in arvicoline rodents…)
$Myotis (Mouse-eared bats)						5	139
^Myotis californicus	Yes	Yes	No	mtLSU, mtSSU	Akbar et al. 2012 (doi: 10.1128/AEM.01791-12)
^Myotis daubentoni	No	No	No	NA	Akbar et al. 2012 (doi: 10.1128/AEM.01791-12)
^Myotis levis	Yes	No	No	Amplified mtLSU but not sequenced	Sanches et al. 2009 (http://dx.doi.org/10.1590/S0100-736X2009000600005)
^Myotis myotis	No	No	No	NA	Akbar et al. 2012 (doi: 10.1128/AEM.01791-12)
^Myotis nigricans	No	No	No	Amplified MSG but no sequence	Sanches et al, 2013 (http://dx.doi.org/10.1016/j.mycmed.2012.11.002)
$Nasua (Coatis)						1	3
^Nasua narica	Yes	No	Yes	NA	Lainson and Shaw 1975 (Pneumocystis and Histpolasma infections in wild animals from the amazon region of brazil)
$Natalus (Funnel-eared bats)						1	8
^Natalus stramineus	Yes	Yes	No	mtLSU	Akbar et al. 2012 (doi: 10.1128/AEM.01791-12)
$Neomys (Eurasian water shrews)						1	4
^Neomys fodiens	Yes	No	Yes	NA	Sebek and Rosicky 1967 (The finding of Pneumocystis carinii in shrews)
$Neotoma (Packrats)						2	23
^Neotoma floridana	Yes	Yes	No	mtLSU, mtSSU	Babb-Biernacki et al. in prep
^Neotoma fuscipes	Yes	No	Yes	NA	Laakonen et al. 2001 (https://doi.org/10.7589/0090-3558-37.2.408)
$Niviventer fulvescens (White-bellied rats)						2	24
^Niviventer fulvescens	Yes	Yes	No	mtLSU, mtSSU, UCS	Latinne et al. 2018 (https://doi.org/10.1017/ S0031182017001883)
^Niviventer niviventer	Yes	Yes	No	mtLSU, mtSSU	Ubpublished on Genbank; Zhao KU843553.1
$Notiosorex (Grey shrews)						1	5
^Notiosorex crawfordi	Yes	No	Yes	NA	Laakonen et al. 2001 (https://doi.org/10.7589/0090-3558-37.2.408)
$Nyctalus (Noctule bats)						2	8
^Nyctalus leisleri	No	No	No	NA	Akbar et al. 2012 (doi: 10.1128/AEM.01791-12)
^Nyctalus noctula	Yes	Yes	No	mtLSU, mtSSU	Akbar et al. 2012 (doi: 10.1128/AEM.01791-12)
$Nyctereutes (Raccoon dogs)						1	2
^Nyctereutes procyonoides	Yes	Yes	No	mtLSU	Riebold et al. 2020 (https://doi.org/10.1016/j.cimid.2020.101531)
$Nyctinomops (Free-tailed bats)						2	4
^Nyctinomops laticaudatus	Yes	No	No	Amplified mtLSU but not sequenced	Sanches et al. 2009 (http://dx.doi.org/10.1590/S0100-736X2009000600005)
^Nyctinomops macrotis	Yes	No	No	Amplified MSG but no sequence	Sanches et al, 2013 (http://dx.doi.org/10.1016/j.mycmed.2012.11.002)
$Ochrotomys (Golden mouse)						1	1
^Ochrotomys nuttali	Yes	Yes	No	mtLSU, mtSSU	Babb-Biernacki unpublished
$Ornithorhynchus (Platypus)						1	1
^Ornithorhynchus anatinus	Yes	Yes	No	mtSSU	Babb-Biernacki unpublished
$Oryctolagus (European rabbit)						1	1
^Oryctolagus cuniculus	Yes	Yes	No	Genome in Prep	Kovacs group in prep
$Oryzomys (Rice rats)						1	6
^Oryzomys capito	Yes	No	Yes	NA	Lainson and Shaw 1975 (Pneumocystis and Histpolasma infections in wild animals from the amazon region of brazil)
$Otomys (African vlei rats)						1	30
^Otomys angoniensis	No	No	No	NA	Petruzela et al. 2019 (https://doi.org/10.1016/j.meegid.2019.103934)
$Ovis (Sheep)						1	7
^Ovis aries	Yes	No	Yes	NA	Settnes and Henrickson 1989 (Pneumocystis carinii in large domestic animals in Denmark)
$Pan (Chimpanzees)						1	2
^Pan troglodytes	Yes	No	Yes	NA	Chandler et al. 1976 (Pulmonary Pneumocystosis in Nonhuman primates)
$Peromyscus (Deer mice)
^Peromyscus attwateri	Yes	Yes	No	mtLSU, mtSSU	Babb-Biernacki et al. in prep	6	80
^Peromyscus boylii	Yes	Yes	No	mtLSU, mtSSU	Babb-Biernacki et al. in prep
^Peromyscus californicus	No	No	Yes	NA	Laakonen et al. 2001 (https://doi.org/10.7589/0090-3558-37.2.408)
^Peromyscus gossypinus	Yes	Yes	No	mtLSU, mtSSU, ITS	Babb-Biernacki et al. in prep
^Peromyscus leucopus	Yes	Yes	No	mtLSU, mtSSU, ITS	Babb-Biernacki et al. in prep
^Peromyscus maniculatus	No	No	Yes	NA	Laakonen et al. 2001 (https://doi.org/10.7589/0090-3558-37.2.408)
$Phodopus (Desert hamsters)						2	3
^Phodopus campbelli	Yes	Yes	No	mtLSU	Unpublished, GenBank: KT020896, Martin-Alonso,A., Chabe,M. and Hugot,J.P.
^Phodopus roborovskii	Yes	Yes	No	mtLSU, DHPS	Unpublished, GenBank: KT020896, Martin-Alonso,A., Chabe,M. and Hugot,J.P.
$Pipistrellus (Pipistrelle bats)						1	31
^Pipistrellus pipistrellus	Yes	Yes	No	mtLSU, mtSSU	Akbar et al. 2012 (doi: 10.1128/AEM.01791-12)
$Pithecia (Saki monkeys)						1	13
^Pithecia pithecia	Yes	Yes	No	mtLSU, mtSSU	Demanche et al. 2001 (DOI: 10.1128/JCM.39.6.2126–2133.2001), Hugot et al. 2003 (DOI: 10.1080/10635150390250893)
$Plecotus (Long-eared bats)						2	18
^Plecotus auritus	Yes	Yes	No	mtLSU, mtSSU	Akbar et al. 2012 (doi: 10.1128/AEM.01791-12)
^Plecotus austriacus	Yes	Yes	No	mtSSU	Akbar et al. 2012 (doi: 10.1128/AEM.01791-12)
$Praomys (Soft-furred mice)						1	13
^Praomys delectorum	Yes	Yes	No	mtLSU, COB, DHFR	Petruzela et al. 2019 (https://doi.org/10.1016/j.meegid.2019.103934)
$Proechimys (Spiny rats)						1	22
^Proechimys guyanensis	Yes	Yes	No	mtLSU, mtSSU	Guillot et al. 2001 (Parallel Phylogenies of Pneumocystis Species and their Mammalian Hosts)
$Procavia (Rock hyraxes)						1	1
^Procavia ruficeps	Yes	No	Yes	NA	Poelma 1975 (Pneumocystis carinii infections in zoo animals)
$Promops (Free-tailed bats)						1	3
^Promops nasutus	Yes	No	No	Amplified MSG but no sequence	Sanches et al. 2013 (http://dx.doi.org/10.1016/j.mycmed.2012.11.002)
$Pteronotus (Naked-backed bats)						2	16
^Pteronotus parnellii	Yes	Yes	No	mtSSU	Akbar et al. 2012 (doi: 10.1128/AEM.01791-12)
^Pteronotus davyi	No	No	No	NA	Akbar et al. 2012 (doi: 10.1128/AEM.01791-12)
$Pteropus (Fruit bats)						1	57
^Pteropus rodricensus	No	No	No	NA	Akbar et al. 2012 (doi: 10.1128/AEM.01791-12)
$Rangifer (Reindeer)						1	1
^Rangifer tarandus	No	No	Yes	NA	Settnes et al. 1986 (Pneumocystis carinii found in lungs of freeliving animals in denmark)
$Rattus (Rats)						11	66
^Rattus andamenensis	Yes	Yes	No	mtLSU	Latinne et al. 2018 (https://doi.org/10.1017/ S0031182017001883)
^Rattus norvegicus	Yes	Yes	No	Genome (P. carinii and P. wakefieldiae)	P. carinii genome: Ma et al. 2015 (doi: https://doi.org/10.1038/ncomms10740), P. wakefieldiae genome: Kovacs group in prep
^Rattus nitidus	Yes	Yes	No	mtLSU, mtSSU	Latinne et al. 2018 (https://doi.org/10.1017/ S0031182017001883)
^Rattus tanezumi	Yes	Yes	No	mtLSU, mtSSU	Latinne et al. 2018 (https://doi.org/10.1017/ S0031182017001883)
^Rattus exulans	Yes	Yes	No	mtLSU, mtSSU	Latinne et al. 2018 (https://doi.org/10.1017/ S0031182017001883)
^Rattus sakeratensis	Yes	Yes	No	mtLSU, mtSSU	Latinne et al. 2018 (https://doi.org/10.1017/ S0031182017001883)
^Rattus tanezumi	Yes	Yes	No	mtLSU, mtSSU	Latinne et al. 2018 (https://doi.org/10.1017/ S0031182017001883)
^Rattus argentiventer	Yes	Yes	No	mtLSU, mtSSU	Latinne et al. 2018 (https://doi.org/10.1017/ S0031182017001883)
^Rattus rattus	Yes	No	No	Undescribed locus amplified but not sequenced	Rothenburger et al. 2015 (DOI: 10.1177/0300985815593123)
^Rattus tiomanicus	Yes	Yes	No	mtLSU, mtSSU	Latinne et al. 2021 (https://doi.org/10.1016/j.meegid.2021.104978)
^Rattus everetti	No	No	No	None (screened mtLSU, mtSSU)	Latinne et al. 2021 (https://doi.org/10.1016/j.meegid.2021.104978)
$Reithrodontomys (Harvest mice)						2	25
^Reithrodontomys fulvescens	Yes	Yes	No	mtLSU, mtSSU, ITS	Babb-Biernacki et al. in prep
^Reithrodontomys megalotis	No	No	Yes	NA	Laakonen et al. 2001 (https://doi.org/10.7589/0090-3558-37.2.408)
$Rhabdomys (Striped mice)						1	5
^Rhabdomys dilectus	Yes	Yes	No	mtLSU, COB	Petruzela et al. 2019 (https://doi.org/10.1016/j.meegid.2019.103934)
$Rhizomys (Bamboo rats)						1	3
^Rhizomys pruinosus	Yes	Yes	No	mtLSU, mtSSU	Latinne et al. 2021 (https://doi.org/10.1016/j.meegid.2021.104978)
$Rousettus (Rousette bats)						1	7
^Rousettus aegyptiacus	Yes	Yes	No	mtLSU, mtSSU	Akbar et al. 2012 (doi: 10.1128/AEM.01791-12)
$Saccostomus (Pouched mice)						1	3
^Saccostomus umbriventer	No	No	No	NA	Petruzela et al. 2019 (https://doi.org/10.1016/j.meegid.2019.103934)
$Saguinus (Tamarins)						5	22
^Saguinus fuscicolis	Yes	Yes	No	mtLSU,mtSSU, DHPS	Demanche et al. 2001 (DOI: 10.1128/JCM.39.6.2126–2133.2001), Hugot et al. 2003 (DOI: 10.1080/10635150390250893)
^Saguinus imperator	Yes	Yes	No	mtLSU	Demanche et al. 2001 (DOI: 10.1128/JCM.39.6.2126–2133.2001), Hugot et al. 2003 (DOI: 10.1080/10635150390250893)
^Saguinus midas	Yes	Yes	No	mtLSU,mtSSU, DHPS	Demanche et al. 2001 (DOI: 10.1128/JCM.39.6.2126–2133.2001), Hugot et al. 2003 (DOI: 10.1080/10635150390250893)
^Saguinus nigricollis	Yes	No	Yes	NA	Richter et al. 1978 (Endemic Pneumocystis carinii in a marmoset colony)
^Saguinus oedipus	Yes	Yes	No	mtLSU, mtSSU	Demanche et al. 2001 (DOI: 10.1128/JCM.39.6.2126–2133.2001), Hugot et al. 2003 (DOI: 10.1080/10635150390250893)
$Saimiri (Squirrel monkey)						1	8
^Saimiri sciureus	Yes	Yes	No	mtLSU, mtSSU, DHPS	Demanche et al. 2001 (DOI: 10.1128/JCM.39.6.2126–2133.2001), Hugot et al. 2003 (DOI: 10.1080/10635150390250893)
$Sciurus (Squirrels)						2	29
^Sciurus aestuans	Yes	Yes	No	mtLSU, mtSSU	Guillot et al. 2001 (Parallel Phylogenies of Pneumocystis Species and their Mammalian Hosts)
^Sciurus carolinensis	Yes	No	No	None (screened mtLSU)	Bishop et al. 1997 (Detection of Pneumocystis DNA in the Lungs of Several Species of Wild Mammal)
$Sorex (Shrews)						10	86
^Sorex alpinus	Yes	No	Yes	NA	Sebek and Rosicky 1967 (The finding of Pneumocystis carinii in shrews)
^Sorex antinorii	Yes	Yes	No	mtLSU, mtSSU, ITS	Danesi et al. 2018 (DOI: 10.1177/1040638718797379)
^Sorex araneus	Yes	Yes	No	mtLSU	Sebek and Rosicky 1967 (The finding of Pneumocystis carinii in shrews), Mazars et al. 1997 (Detection of Pneumocystis in European wild animals), Laakonen et al. 2005 (doi:10.1017/S003118200500931)
^Sorex caecutiens	Yes	No	Yes	NA	Laakkonen et al. 1993 (DOI: 10.7589/0090-3558-29.2.27)
^Sorex cinereus	No	No	Yes	NA	Laakkonen et al. 1997 (Lung parasites of shrews from Pennsylvania)
^Sorex fumeus	No	No	Yes	NA	Laakkonen et al. 1997 (Lung parasites of shrews from Pennsylvania)
^Sorex isodon	Yes	No	Yes	NA	Laakonen 1998 (Pneumocystis carinii in wildlife)
^Sorex minutus	No	No	Yes	NA	Sebek and Rosicky 1967 (The finding of Pneumocystis carinii in shrews)
^Sorex minutissimus	Yes	No	Yes	NA	Laakonen 1998 (Pneumocystis carinii in wildlife)
^Sorex ornatus	Yes	No	Yes	NA	Laakkonen et al. 2001 (https://doi.org/10.7589/0090-3558-37.2.408)
$Spermophilus (Ground squirrels)						1	15
^Spermophilus erythrogenys	Yes	Yes	No	mtLSU, DHPS	Unpublished, GenBank: KT020896, Martin-Alonso,A., Chabe,M. and Hugot,J.P.
$Steatomys (Fat mice)						1	8
^Steatomys sp. ind.	No	No	No	NA	Petruzela et al. 2019 (https://doi.org/10.1016/j.meegid.2019.103934)
$Sturnira (Yellow-shouldered bats)						1	24
^Sturnira lilium	Yes	No	No	Amplified mtLSU but not sequenced	Sanches et al. 2009 (http://dx.doi.org/10.1590/S0100-736X2009000600005)
$Stylodipus (Three-toed jerboas)						1	3
^Stylodipus sungorus	Yes	Yes	No	DHPS	Unpublished, GenBank: KT020896, Martin-Alonso,A., Chabe,M. and Hugot,J.P.
$Suncus (Shrews)						1	19
^Suncus murinus	Yes	No	Yes	NA	Cross and Hung 1975 (Latent Pneumocystis carinii infections in some mammals from taipei hsien, taiwan)
$Sundamys (Sunda rats)						1	4
^Sundamys muelleri	Yes	Yes	No	mtLSU, mtSSU	Latinne et al. 2021 (https://doi.org/10.1016/j.meegid.2021.104978)
$Sus (Pigs)						1	9
^Sus scrofa domesticus	Yes	Yes	No	SODA	Denis et al. 2000 (Genetic divergence at the SODA locus of six different formae speciales of Pneumocystis carinii),
$Tachyoryctes (African mole rats)						1	2
^Tachyoryctes splendens	No	No	No	NA	Petruzela et al. 2019 (https://doi.org/10.1016/j.meegid.2019.103934)
$Talpa (Moles)						1	13
^Talpa europaea	Yes	Yes	No	mtLSU	Mazars et al. 1997 (Detection of Pneumocystis in European wild animals)
$Tadarida (Frree-tailed bats)						1	8
^Tadarida brasiliensis	Yes	Yes	No	mtLSU, mtSSU	Akbar et al. 2012 (doi: 10.1128/AEM.01791-12)
$Tupaia (Tree shrews)						1	19
^Tupaia glis	Yes	No	Yes	NA	Poelma 1975 (Pneumocystis carinii infections in zoo animals)
$Vulpes (Foxes)						2	12
^Vulpes vulpes	Yes	Yes	Yes	mtLSU	Settnes et al. 1986 (Pneumocystis carinii found in lungs of freeliving animals in denmark), Riebold et al. 2020 (First molecular detection…)
^Vulpes zerda	Yes	No	Yes	NA	Poelma 1975 (Pneumocystis carinii infections in zoo animals)
Total Genera Sampled:	Species positive for Pneumocystis:	Genetic data available:	Total microscopy ID only:			Average species sampled per genus:	Average number of species per genus:
142	197	129	73			1.69014	14.1831
Total Species Sampled:	Species negative for Pneumocystis:	No genetic data:				Genera with only a single species sampled:	Number of actually monotypic genera:
240	43	111				101	18
						Standard deviation:	Standard deviation:
						1.63379	24.7889
						Standard error:	Standard error:
						0.137104	2.08024

## Sheet: Rodentia
Rodentia (Rodents)			Species Sampled	116/2623	Genera Sampled	62/529
	Positive for Pneumocystis	Genetic Sequence Available	Microscopy ID Only	Sequences Collected	Reference
$Acomys (Spiny Mice)
^Acomys ngurui	Yes	Yes	No	COB, mtLSU	Petruzela et al. 2019 (https://doi.org/10.1016/j.meegid.2019.103934)
^Acomys muzei	Yes	Yes	No	DHFR, COB, mtLSU	Petruzela et al. 2019 (https://doi.org/10.1016/j.meegid.2019.103934)
^Acomys ignitus	No	No	No	NA	Petruzela et al. 2019 (https://doi.org/10.1016/j.meegid.2019.103934)
^Acomys wilsoni	No	No	No	NA	Petruzela et al. 2019 (https://doi.org/10.1016/j.meegid.2019.103934)
$Aethomys (Rock Mice)
^Aethomys hindei	No	No	No	NA	Petruzela et al. 2019 (https://doi.org/10.1016/j.meegid.2019.103934)
^Aethomys chrysophilus	Yes	Yes	No	DHFR, mtLSU, COB	Petruzela et al. 2019 (https://doi.org/10.1016/j.meegid.2019.103934)
^Aethomys kaiseri	Yes	Yes	No	mtLSU, COB	Petruzela et al. 2019 (https://doi.org/10.1016/j.meegid.2019.103934)
$Allactaga (Four and five-toed jerboas)
^Allactaga balikunica	Yes	Yes	No	DHPS	Unpublished, GenBank: KT020896, Martin-Alonso,A., Chabe,M. and Hugot,J.P.
$Allocricetulus (Asian hamsters)
^Allocricetulus curtatus	Yes	Yes	No	mtLSU, DHPS	Unpublished, GenBank: KT020896, Martin-Alonso,A., Chabe,M. and Hugot,J.P.
$Apodemus (Eurasian field mice)
^Apodemus agrarius	No	No	Yes	NA	Laakonen et al. 2005 (doi:10.1017/S003118200500931)
^Apodemus argenteus	Yes	No	Yes	NA	Shiota et al. 1986 (Prevalence of Pneumocystis carinii in Wild Rodents in japan)
^Apodemus flavicollis	Yes	Yes	No	mtLSU, mtSSU, ITS	Laakonen et al. 2005 (doi:10.1017/S003118200500931), Danesi et al. 2016 (http://dx.doi.org/10.1016/j.funbio.2015.08.019)
^Apodemus speciosus	Yes	No	Yes	NA	Shiota et al. 1986 (Prevalence of Pneumocystis carinii in Wild Rodents in japan)
^Apodemus sylvaticus	Yes	Yes	No	mtLSU, mtSSU	Mazars et al. 1997 (Detection of Pneumocystis in European wild animals), Demanche et al. 2015 ( doi: 10.1371/journal.pone.0120839)
$Apomys (Earthworm mice)
^Apomys banahao	Yes	Yes	No	mtLSU, mtSSU	Latinn et al. 2021 (https://doi.org/10.1016/j.meegid.2021.104978)
$Arvicola (Water voles)
^Arvicola terrestris	Yes	No	Yes	NA	Goyot et al. 1986 (Arvicola terrestris, Linnaeus 1758, a reservour of Pneumocystis sp.)
$Atlantoxerus (Barbary ground squirrel)
^Atlantoxerus getulus	Yes	Yes	No	mtLSU, DHPS	Unpublished, GenBank: KT020896, Martin-Alonso,A., Chabe,M. and Hugot,J.P.
$Bandicota (Bandicoot rats)
^Bandicota indica	Yes	Yes	No	mtLSU, mtSSU	Latinne et al. 2018 (https://doi.org/10.1017/ S0031182017001883)
^Bandicota savilei	Yes	Yes	No	mtLSU, mtSSU	Latinne et al. 2018 (https://doi.org/10.1017/ S0031182017001883)
$Berylmys (White-toothed rats)
^Berylmys berdmorei	Yes	Yes	No	mtLSU, mtSSU	Latinne et al. 2018 (https://doi.org/10.1017/ S0031182017001883)
^Berylmys bowersi	Yes	Yes	No	mtLSU, mtSSU	Latinne et al. 2018 (https://doi.org/10.1017/ S0031182017001883)
$Callosciurus (Beautiful squirrels)
^Callosciurus finlaysonii	Yes	Yes	No	mtLSU, mtSSU	Danesi et al. 2018 (DOI: 10.1177/1040638718797379)
$Cannomys (Lesser bamboo rat)
^Cannomys badius	Yes	Yes	No	mtLSU, mtSSU	Latinne et al. 2018 (https://doi.org/10.1017/ S0031182017001883)
$Cavia (Guinea pigs)
^Cavia porcellus	Yes	No	Yes	NA	Chagas 1909
$Chaetodipus (Pocket mice)
^Chaetodipus californicus	Yes	No	Yes	NA	Laakonen et al. 2001 (https://doi.org/10.7589/0090-3558-37.2.408)
$Clethrionomys (Red-backed voles)
^Clethrionomys glareolus	Yes	No	Yes	NA	Sukura et al. 1992 (Pneumocystis carinii in coricosteroid-treated voles…)
^Clethrionomys rufocanus	Yes	No	Yes	NA
$Cricetulus (Ratlike Hamsters)
^Cricetulus longicaudatus	Yes	Yes	No	mtLSU, DHPS	Unpublished, GenBank: KT020896, Martin-Alonso,A., Chabe,M. and Hugot,J.P.
^Cricetulus migratorius	Yes	Yes	No	mtLSU, DHPS	Unpublished, GenBank: KT020896, Martin-Alonso,A., Chabe,M. and Hugot,J.P.
^Cricetulus sokolovi	Yes	Yes	No	mtLSU	Unpublished, GenBank: KT020896, Martin-Alonso,A., Chabe,M. and Hugot,J.P. NA
$Ctenodactylus (gundis)
^Ctenodactylus gundi	Yes	Yes	No	mtLSU, mtSSU	Latinne et al. 2018 (https://doi.org/10.1017/ S0031182017001883)
$Cuniculus (Paca)
^Cuniculus paca	Yes	Yes	No	mtLSU, mtSSU	Guillot et al. 2001 (Parallel Phylogenies of Pneumocystis Species and their Mammalian Hosts)
$Cynomys (Prairie dogs)
^Cynomys ludovicianus	Yes	Yes	No	Mitogenome	Ma et al. In Prep
$Eliomys (Garden dormice)
^Eliomys quercinus	Yes	Yes	No	mtLSU	Mazars et al. 1997 (Detection of Pneumocystis in European wild animals)
$Funambulus (Palm squirrels)
^Funambulus palmarum	Yes	No	Yes	NA	Poelma 1975 (Pneumocystis carinii infections in zoo animals)
$Gerbilliscus (Gerbils)
^Gerbilliscus vicinus	Yes	Yes	No	mtLSU, DHFR, COB	Petruzela et al. 2019 (https://doi.org/10.1016/j.meegid.2019.103934)
$Grammomys (Thicket rats)
^Grammomys surdaster	Yes	Yes	No	mtLSU, COB	Petruzela et al. 2019 (https://doi.org/10.1016/j.meegid.2019.103934)
$Graphiurus (African dormice)
^Graphiurus murinus	Yes	Yes	No	mtLSU, COB	Petruzela et al. 2019 (https://doi.org/10.1016/j.meegid.2019.103934)
^Graphiurus sp. indet.	Yes	Yes	No	mtLSU, COB	Petruzela et al. 2019 (https://doi.org/10.1016/j.meegid.2019.103934)
$Heliophobius (Silvery mole rat)
^Heliophobius argenteocinereus	Yes	Yes	No	mtLSU, COB	Petruzela et al. 2019 (https://doi.org/10.1016/j.meegid.2019.103934)
$Hylomyscus (African wood mice)
^Hylomyscus arcimontensis	Yes	Yes	No	COB, DHFR	Petruzela et al. 2019 (https://doi.org/10.1016/j.meegid.2019.103934)
$Lemmus (True lemmings)
^Lemmus lemmus	No	No	Yes	NA	Laakonen et al. 1995 (Pneumocystis in arvicoline rodents…)
$Lemniscomys (Zebra mice)
^Lemniscomys striatus	Yes	Yes	No	COB	Petruzela et al. 2019 (https://doi.org/10.1016/j.meegid.2019.103934)
^Lemniscomys rosalia	Yes	Yes	No	mtLSU, COB	Petruzela et al. 2019 (https://doi.org/10.1016/j.meegid.2019.103934)
$Leopoldamys (Long-tailed giant rats)
^Leopoldamys herberti	Yes	Yes	No	mtLSU, mtSSU	Latinne et al. 2018 (https://doi.org/10.1017/ S0031182017001883)
^Leopoldamys neilli	Yes	Yes	No	mtLSU, mtSSU	Latinne et al. 2021 (https://doi.org/10.1016/j.meegid.2021.104978)
^Leopoldamys sabanus	Yes	Yes	No	mtLSU, mtSSU	Latinne et al. 2021 (https://doi.org/10.1016/j.meegid.2021.104978)
$Lophuromys (Brush-furred mice)
^Lophuromys kilonzoi	Yes	Yes	No	mtLSU, COB	Petruzela et al. 2019 (https://doi.org/10.1016/j.meegid.2019.103934)
^Lophuromys makundii	Yes	Yes	No	mtLSU, COB	Petruzela et al. 2019 (https://doi.org/10.1016/j.meegid.2019.103934)
$Mastomys (Multimammate mice)
^Mastomys natalensis	Yes	Yes	No	mtLSU, COB, DHFR	Petruzela et al. 2019 (https://doi.org/10.1016/j.meegid.2019.103934)
$Maxomys (Spiny rats)
^Maxomys surifer	Yes	Yes	No	mtLSU, mtSSU	Latinne et al. 2018 (https://doi.org/10.1017/ S0031182017001883)
$Meriones (Gerbils)
^Meriones meridianus	Yes	Yes	No	mtLSU, DHPS	Unpublished, GenBank: KT020896, Martin-Alonso,A., Chabe,M. and Hugot,J.P.
^Meriones unguiculatus	Yes	Yes	No	5.8S, ITS, 18S, mtLSU	Li et al. 2008 (doi: 10.1007/s11427-008-0057-1), Feng et al. 2010 (doi: oi: 10.1007/s11427-010-4074-5)
$Mesocricetus (Hamsters)
^Mesocricetus auratus	Yes	No	Yes	NA	Cho et al. 1999 (Karyotypes of Pneumocystis carinii derived from several mammals)
$Micromys (Harvest mice)
^Micromys minutus	Yes	No	No	NA	Laakonen et al. 2005 (doi:10.1017/S003118200500931)
$Microtus (Meadow voles)
^Microtus agrestis	Yes	Yes	No	mtLSU	Mazars et al. 1997 (Detection of Pneumocystis in European wild animals)
^Microtus arvalis	No	No	Yes	NA	Sebek and Rosicky 1967 (The finding of Pneumocystis carinii in shrews)
^Microtus californicus	Yes	No	Yes	NA	Laakonen et al. 2001 (https://doi.org/10.7589/0090-3558-37.2.408)
^Microtus gregalis	Yes	Yes	No	mtLSU, DHPS	Unpublished, GenBank: KT020896, Martin-Alonso,A., Chabe,M. and Hugot,J.P.
^Microtus montebelli	Yes	No	Yes	NA	Shiota et al. 1986 (Prevalence of Pneumocystis carinii in Wild Rodents in japan)
^Microtus multiplex	No	No	No	NA	Danesi et al. 2018 (DOI: 10.1177/1040638718797379)
^Microtus oeconomus	Yes	No	Yes	NA	Laakonen et al. 1995 (Pneumocystis in arvicoline rodents…)
^Microtus subterraneus	No	No	Yes	NA	Sebek and Rosicky 1967 (The finding of Pneumocystis carinii in shrews)
$Mus (Mice)
^Mus caroli	Yes	Yes	No	mtLSU, mtSSU	Latinne et al. 2018 (https://doi.org/10.1017/ S0031182017001883)
^Mus cooki	Yes	Yes	No	mtLSU, mtSSU	Latinne et al. 2018 (https://doi.org/10.1017/ S0031182017001883)
^Mus cervicolor	Yes	Yes	No	mtLSU, mtSSU	Latinne et al. 2018 (https://doi.org/10.1017/ S0031182017001883)
^Mus minutoides	Yes	Yes	No	mtLSU, COB, DHFR	Petruzela et al. 2019 (https://doi.org/10.1016/j.meegid.2019.103934)
^Mus musculus	Yes	Yes	No	Genome	Genome: Ma et al. 2015 (doi: https://doi.org/10.1038/ncomms10740)
^Mus pahari	Yes	Yes	No	mtLSU, mtSSU	Latinne et al. 2021 (https://doi.org/10.1016/j.meegid.2021.104978)
^Mus triton	Yes	Yes	No	mtLSU, COB	Petruzela et al. 2019 (https://doi.org/10.1016/j.meegid.2019.103934)
$Muscardinus (Common dormouse)
^Muscardinus avellanarius	No	No	Yes	NA	Sebek and Rosicky 1967 (The finding of Pneumocystis carinii in shrews)
$Myocastor (Nutria)
^Myocastor coypus	Yes	Yes	No	mtLSU, mtSSU	Danesi et al. 2018 (DOI: 10.1177/1040638718797379)
$Myodes (Red-backed voles)
^Myodes glareolus	Yes	Yes	No	mtLSU, mtSSU, ITS	Danesi et al. 2018 (DOI: 10.1177/1040638718797379)
^Myodes smithii	No	No	Yes	NA	Shiota et al. 1986 (Prevalence of Pneumocystis carinii in Wild Rodents in japan)
$Myomyscus (African mice)
^Myomyscus brockmani	Yes	Yes	No	mtLSU, COB, DHFR	Petruzela et al. 2019 (https://doi.org/10.1016/j.meegid.2019.103934)
$Myopus (Wood lemmings)
^Myopus schisticolor	No	No	Yes	NA	Laakkonen et al. 1995 (Pneumocystis in arvicoline rodents…)
$Neotoma (Packrats)
^Neotoma floridana	Yes	Yes	No	mtLSU, mtSSU	Babb-Biernacki et al. in prep
^Neotoma fuscipes	Yes	No	Yes	NA	Laakonen et al. 2001 (https://doi.org/10.7589/0090-3558-37.2.408)
$Niviventer fulvescens (White-bellied rats)
^Niviventer fulvescens	Yes	Yes	No	mtLSU, mtSSU, UCS	Latinne et al. 2018 (https://doi.org/10.1017/ S0031182017001883)
^Niviventer niviventer	Yes	Yes	No	mtLSU, mtSSU	Ubpublished on Genbank; Zhao KU843553.1
$Ochrotomys (Golden mouse)
^Ochrotomys nuttali	Yes	Yes	No	mtLSU, mtSSU	Babb-Biernacki in prep
$Oryzomys (Rice rats)
^Oryzomys capito	Yes	No	Yes	NA	Lainson and Shaw 1975 (Pneumocystis and Histpolasma infections in wild animals from the amazon region of brazil)
$Otomys (African vlei rats)
^Otomys angoniensis	No	No	No	NA	Petruzela et al. 2019 (https://doi.org/10.1016/j.meegid.2019.103934)
$Peromyscus (Deer mice)
^Peromyscus attwateri	Yes	Yes	No	mtLSU, mtSSU	Babb-Biernacki et al. in prep
^Peromyscus boylii	Yes	Yes	No	mtLSU, mtSSU	Babb-Biernacki et al. in prep
^Peromyscus californicus	No	No	Yes	NA	Laakonen et al. 2001 (https://doi.org/10.7589/0090-3558-37.2.408)
^Peromyscus gossypinus	Yes	Yes	No	mtLSU, mtSSU, ITS	Babb-Biernacki et al. in prep
^Peromyscus leucopus	Yes	Yes	No	mtLSU, mtSSU, ITS	Babb-Biernacki et al. in prep
^Peromyscus maniculatus	No	No	Yes	NA	Laakonen et al. 2001 (https://doi.org/10.7589/0090-3558-37.2.408)
$Phodopus (Desert hamsters)
^Phodopus campbelli	Yes	Yes	No	mtLSU	Unpublished, GenBank: KT020896, Martin-Alonso,A., Chabe,M. and Hugot,J.P.
^Phodopus roborovskii	Yes	Yes	No	mtLSU, DHPS	Unpublished, GenBank: KT020896, Martin-Alonso,A., Chabe,M. and Hugot,J.P.
$Praomys (Soft-furred mice)
^Praomys delectorum	Yes	Yes	No	mtLSU, COB, DHFR	Petruzela et al. 2019 (https://doi.org/10.1016/j.meegid.2019.103934)
$Proechimys (Spiny rats)
^Proechimys guyanensis	Yes	Yes	No	mtLSU, mtSSU	Guillot et al. 2001 (Parallel Phylogenies of Pneumocystis Species and their Mammalian Hosts)
$Rattus (Rats)
^Rattus andamenensis	Yes	Yes	No	mtLSU	Latinne et al. 2018 (https://doi.org/10.1017/ S0031182017001883)
^Rattus norvegicus	Yes	Yes	No	Genome (P. carinii and P. wakefieldiae)	P. carinii genome: Ma et al. 2015 (doi: https://doi.org/10.1038/ncomms10740), P. wakefieldiae genome: Kovacs group in prep
^Rattus nitidus	Yes	Yes	No	mtLSU, mtSSU	Latinne et al. 2018 (https://doi.org/10.1017/ S0031182017001883)
^Rattus tanezumi	Yes	Yes	No	mtLSU, mtSSU	Latinne et al. 2018 (https://doi.org/10.1017/ S0031182017001883)
^Rattus exulans	Yes	Yes	No	mtLSU, mtSSU	Latinne et al. 2018 (https://doi.org/10.1017/ S0031182017001883)
^Rattus sakeratensis	Yes	Yes	No	mtLSU, mtSSU	Latinne et al. 2018 (https://doi.org/10.1017/ S0031182017001883)
^Rattus tanezumi	Yes	Yes	No	mtLSU, mtSSU	Latinne et al. 2018 (https://doi.org/10.1017/ S0031182017001883)
^Rattus argentiventer	Yes	Yes	No	mtLSU, mtSSU	Latinne et al. 2018 (https://doi.org/10.1017/ S0031182017001883)
^Rattus rattus	Yes	No	No	Undescribed locus amplified but not sequenced	Rothenburger et al. 2015 (DOI: 10.1177/0300985815593123)
^Rattus tiomanicus	Yes	Yes	No	mtLSU, mtSSU	Latinne et al. 2021 (https://doi.org/10.1016/j.meegid.2021.104978)
^Rattus everetti	No	No	NO	None (screened mtLSU, mtSSU)	Latinne et al. 2021 (https://doi.org/10.1016/j.meegid.2021.104978)
$Reithrodontomys (Harvest mice)
^Reithrodontomys fulvescens	Yes	Yes	No	mtLSU, mtSSU, ITS	Babb-Biernacki et al. in prep
^Reithrodontomys megalotis	No	No	Yes	NA	Laakonen et al. 2001 (https://doi.org/10.7589/0090-3558-37.2.408)
$Rhabdomys (Striped mice)
^Rhabdomys dilectus	Yes	Yes	No	mtLSU, COB	Petruzela et al. 2019 (https://doi.org/10.1016/j.meegid.2019.103934)
$Rhizomys (Bamboo rats)
^Rhizomys pruinosus	Yes	Yes	No	mtLSU, mtSSU	Latinne et al. 2021 (https://doi.org/10.1016/j.meegid.2021.104978)
$Saccostomus (Pouched mice)
^Saccostomus umbriventer	No	No	No	NA	Petruzela et al. 2019 (https://doi.org/10.1016/j.meegid.2019.103934)
$Sciurus (Squirrels)
^Sciurus aestuans	Yes	Yes	No	mtLSU, mtSSU	Guillot et al. 2001 (Parallel Phylogenies of Pneumocystis Species and their Mammalian Hosts)
^Sciurus carolinensis	Yes	No	No	None (screened mtLSU)	Bishop et al. 1997 (Detection of Pneumocystis DNA in the Lungs of Several Species of Wild Mammal)
$Spermophilus (Ground squirrels)
^Spermophilus erythrogenys	Yes	Yes	No	mtLSU, DHPS	Unpublished, GenBank: KT020896, Martin-Alonso,A., Chabe,M. and Hugot,J.P.
$Steatomys (Fat mice)
^Steatomys sp. ind.	No	No	No	NA	Petruzela et al. 2019 (https://doi.org/10.1016/j.meegid.2019.103934)
$Stylodipus (Three-toed jerboas)
^Stylodipus sungorus	Yes	Yes	No	DHPS	Unpublished, GenBank: KT020896, Martin-Alonso,A., Chabe,M. and Hugot,J.P.
$Sundamys (Sunda rats)
^Sundamys muelleri	Yes	Yes	No	mtLSU, mtSSU	Latinne et al. 2021 (https://doi.org/10.1016/j.meegid.2021.104978)
$Tachyoryctes (African mole rats)
^Tachyoryctes splendens	No	No	No	NA	Petruzela et al. 2019 (https://doi.org/10.1016/j.meegid.2019.103934)
Total Genera Sampled:	Species positive for Pneumocystis:	Genetic data available:	Total microscopy ID only:
62	97	80	24
Total Species Sampled:	Species negative for Pneumocystis:	No genetic data:
116	19	36

## Sheet: Afrosoricida
Afrosoricida (Tenrecs and Allies)			Species Sampled	1/55	Genera Sampled	1/20
	Positive for Pneumocystis	Genetic Sequence Available	Microscopy ID Only	Sequences Collected	Reference
$Microgale (shrew tenrecs)
^Microgale sp.	Yes	No	Yes	NA	Laakonen 1998 (Pneumocystis carinii in wildlife)
Total Genera Sampled:	Species positive for Pneumocystis:	Genetic data available:	Total microscopy ID only:
1	1	0	1
Total Species Sampled:	Species negative for Pneumocystis:	No genetic data:
1	0	1

## Sheet: Artiodactyla
Artiodactyla (Even-toed Ungulates)			Species Sampled	7/359	Genera Sampled	7/131
	Positive for Pneumocystis	Genetic Sequence Available	Microscopy ID Only	Sequences Collected	Reference
$Bos (Cattle)
^Bos taurus	Yes	No	Yes	NA	Settnes and Henrickson 1989 (Pneumocystis carinii in large domestic animals in Denmark)
$Capra (Goats)
^Capra aegagrus hircus	Yes	Yes	No	mtLSU	McConnell et al. 1971 (Pneumocystosis in a domestic goat), Sakakibara et al. 2012 (doi: 10.1292/jv ms.12- 0465)
$Capreolus (Roe deer)
^Capreolus capreolus	Yes	No	Yes	NA	Settnes et al. 1986 (Pneumocystis carinii found in lungs of freeliving animals in denmark)
$Hippotragus (Antelopes)
^Hippotragus niger	Yes	No	Yes	NA	Wilson et al. 1974 (Observations on mortality rates and disease in roan and sable antelope on nature reserves in the transvaal)
$Ovis (Sheep)
^Ovis aries	Yes	No	Yes	NA	Settnes and Henrickson 1989 (Pneumocystis carinii in large domestic animals in Denmark)
$Rangifer (Reindeer)
^Rangifer tarandus	No	No	Yes	NA	Settnes et al. 1986 (Pneumocystis carinii found in lungs of freeliving animals in denmark)
$Sus (Pigs)
^Sus scrofa domesticus	Yes	Yes	No	SODA	Denis et al. 2000 (Genetic divergence at the SODA locus of six different formae speciales of Pneumocystis carinii),
Total Genera Sampled:	Species positive for Pneumocystis:	Genetic data available:	Total microscopy ID only:
7	6	2	5
Total Species Sampled:	Species negative for Pneumocystis:	No genetic data:
7	1	5

## Sheet: Carnivora
Carnivora (Carnivores)			Species Sampled	14/307	Genera Sampled	10/130
	Positive for Pneumocystis	Genetic Sequence Available	Microscopy ID Only	Sequences Collected	Reference
$Ailurus (Red panda)
^Ailurus fulgens	Yes	No	Yes	NA	Poelma 1975 (Pneumocystis carinii infections in zoo animals)
$Canis (Dogs)
^Canis lupus familiaris	Yes	Yes	No	Genome	Kovacs group in prep
$Felis (Small cats)
^Felis catus	Yes	Yes	No	mtLSU, mtSSU	Danesi et al. 2018 (doi: 10.1093/mmy/myy139)
$Galictis (Grisons)
^Galictis vittata	Yes	Yes	No	mtLSU (not on genbank), mtSSU (not on genbank)	Guillot et al. 2001 (Parallel Phylogenies of Pneumocystis Species and their Mammalian Hosts)
$Martes (Martens)
^Martes foina	No	No	Yes	NA	Settnes et al. 1986 (Pneumocystis carinii found in lungs of freeliving animals in denmark)
$Meles (Old world badgers)
^Meles meles	No	No	No	NA	Settnes et al. 1986 (Pneumocystis carinii found in lungs of freeliving animals in denmark), Danesi et al. 2015 (http://dx.doi.org/10.1016/j.funbio.2015.08.019)
$Melogale (Ferret-badgers)
^Melogale moschata	Yes	No	Yes	NA	Cross and Hung 1975 (Latent Pneumocystis carinii infections in some mammals from taipei hsien, taiwan)
$Mustela (Weasels)
^Mustela putorius furo	Yes	Yes	No	mtLSU, mtSSU, nucRNA,TS, MSG, AROM,DHPS, DHFR	Aliouat-Denis et al. 2008 (https://doi.org/10.1016/j.meegid.2008.05.001)
^Mustela sibirica	No	No	Yes	NA	Yoshida and Ikai 1978 (Pneumocystis carinii pneumonia: epidemiology in Japan)
^Mustela nivalis	Yes	No	Yes	NA	Laakkonen et al. 1998 (Lung parasites of least weasels in Finland)
$Nasua (Coatis)
^Nasua narica	Yes	No	Yes	NA	Lainson and Shaw 1975 (Pneumocystis and Histpolasma infections in wild animals from the amazon region of brazil)
$Nyctereutes (Raccoon dogs)
^Nyctereutes procyonoides	Yes	Yes	No	mtLSU	Riebold et al. 2020 (https://doi.org/10.1016/j.cimid.2020.101531)
$Vulpes (Foxes)
^Vulpes vulpes	Yes	Yes	Yes	mtLSU	Settnes et al. 1986 (Pneumocystis carinii found in lungs of freeliving animals in denmark), Riebold et al. 2020 (First molecular detection…)
^Vulpes zerda	Yes	No	Yes	NA	Poelma 1975 (Pneumocystis carinii infections in zoo animals)
Total Species Sampled:	Species positive for Pneumocystis:	Genetic data avaialble:	Total microscopy ID only:
14	11	6	8
Total Genera Sampled:	Species negative for Pneumocystis:	Genetic data unavaialble:
11	3	8

## Sheet: Chiroptera
Chiroptera (Bats)			Species Sampled	37/1447	Genera Sampled	24/237
	Positive for Pneumocystis	Genetic Sequence Available	Microscopy ID Only	Sequences Collected	Reference
$Artibeus (Neotropical fruit bats)
^Artibeus fimbriatus	Yes	No	No	Amplified mtLSU but not sequenced	Sanches et al. 2009 (http://dx.doi.org/10.1590/S0100-736X2009000600005)
^Artibeus hirsutus	Yes	Yes	No	mtLSU, mtSSU	Akbar et al. 2012 (DOI: 10.1128/AEM.01791-12)
^Artibeus lituratus	No	No	No	Amplified MSG but not sequenced	Sanches et al, 2013 (http://dx.doi.org/10.1016/j.mycmed.2012.11.002)
$Carollia (Short-tailed fruit bats)
^Carollia perspicillata	No	No	No	NA	Akbar et al. 2012 (doi: 10.1128/AEM.01791-12), Sanches et al, 2013 (http://dx.doi.org/10.1016/j.mycmed.2012.11.002)
$Desmodus (Vampire bats)
^Desmodus rotundus	Yes	No	No	Amplified mtLSU but not sequenced, Amplified MSG but not sequenced	Sanches et al. 2009 (http://dx.doi.org/10.1590/S0100-736X2009000600005), Sanches et al. 2013 (http://dx.doi.org/10.1016/j.mycmed.2012.11.002)
$Diaemus (White-winged vampire bat)
^Diaemus youngii	No	No	No	Amplified MSG but not sequenced	Sanches et al, 2013 (http://dx.doi.org/10.1016/j.mycmed.2012.11.002)
$Diphylla (Hairy-legged vampire bats)
^Diphylla ecaudata	Yes	No	No	Amplified mtLSU but not sequenced	Sanches et al. 2009 (http://dx.doi.org/10.1590/S0100-736X2009000600005)
$Eptesicus (House bats)
^Eptesicus furinalis	Yes	No	No	Amplified MSG but not sequenced	Sanches et al, 2013 (http://dx.doi.org/10.1016/j.mycmed.2012.11.002)
^Eptesicus serotinus	Yes	Yes	No	mtLSU, mtSSU	Akbar et al. 2012 (doi: 10.1128/AEM.01791-12)
$Eumops (Mastiff bats)
^Eumops glaucinus	No	No	No	Amplified MSG but no sequence	Sanches et al, 2013 (http://dx.doi.org/10.1016/j.mycmed.2012.11.002)
$Glossophaga (Long-tongued bats)
^Glossophaga soricina	Yes	Yes	No	mtLSU, mtSSU	Akbar et al. 2012 (doi: 10.1128/AEM.01791-12)
$Histiotus (Big-eared brown bats)
^Histiotus velatus	Yes	No	No	Amplified MSG but no sequence	Sanches et al, 2013 (http://dx.doi.org/10.1016/j.mycmed.2012.11.002)
$Lasiurus (Hairy-tailed bats)
^Lasiurus blossevillii	Yes	No	No	Amplified MSG but no sequence	Sanches et al, 2013 (http://dx.doi.org/10.1016/j.mycmed.2012.11.002)
$Molossus (Free-tailed bats)
^Molossus molossus	Yes	No	No	Amplified mtLSU but not sequenced	Sanches et al. 2009 (http://dx.doi.org/10.1590/S0100-736X2009000600005)
^Molossus rufus	Yes	No	No	Amplified MSG but no sequence	Sanches et al, 2013 (http://dx.doi.org/10.1016/j.mycmed.2012.11.002)
^Molossus currentium	Yes	No	No	Amplified MSG but no sequence	Sanches et al, 2013 (http://dx.doi.org/10.1016/j.mycmed.2012.11.002)
$Mormoops (Ghost-faced bats)
^Mormoops megalophylla	No	No	No	NA	Akbar et al. 2012 (doi: 10.1128/AEM.01791-12)
$Myotis (Mouse-eared bats)
^Myotis californicus	Yes	Yes	No	mtLSU, mtSSU	Akbar et al. 2012 (doi: 10.1128/AEM.01791-12)
^Myotis daubentoni	No	No	No	NA	Akbar et al. 2012 (doi: 10.1128/AEM.01791-12)
^Myotis levis	Yes	No	No	Amplified mtLSU but not sequenced	Sanches et al. 2009 (http://dx.doi.org/10.1590/S0100-736X2009000600005)
^Myotis myotis	No	No	No	NA	Akbar et al. 2012 (doi: 10.1128/AEM.01791-12)
^Myotis nigricans	No	No	No	Amplified MSG but no sequence	Sanches et al, 2013 (http://dx.doi.org/10.1016/j.mycmed.2012.11.002)
$Natalus (Funnel-eared bats)
^Natalus stramineus	Yes	Yes	No	mtLSU	Akbar et al. 2012 (doi: 10.1128/AEM.01791-12)
$Nyctalus (Noctule bats)
^Nyctalus leisleri	No	No	No	NA	Akbar et al. 2012 (doi: 10.1128/AEM.01791-12)
^Nyctalus noctula	Yes	Yes	No	mtLSU, mtSSU	Akbar et al. 2012 (doi: 10.1128/AEM.01791-12)
$Nyctinomops (Free-tailed bats)
^Nyctinomops laticaudatus	Yes	No	No	Amplified mtLSU but not sequenced	Sanches et al. 2009 (http://dx.doi.org/10.1590/S0100-736X2009000600005)
^Nyctinomops macrotis	Yes	No	No	Amplified MSG but no sequence	Sanches et al, 2013 (http://dx.doi.org/10.1016/j.mycmed.2012.11.002)
$Pipistrellus (Pipistrelle bats)
^Pipistrellus pipistrellus	Yes	Yes	No	mtLSU, mtSSU	Akbar et al. 2012 (doi: 10.1128/AEM.01791-12)
$Plecotus (Long-eared bats)
^Plecotus auritus	Yes	Yes	No	mtLSU, mtSSU	Akbar et al. 2012 (doi: 10.1128/AEM.01791-12)
^Plecotus austriacus	Yes	Yes	No	mtSSU	Akbar et al. 2012 (doi: 10.1128/AEM.01791-12)
$Promops (Free-tailed bats)
^Promops nasutus	Yes	No	No	Amplified MSG but no sequence	Sanches et al. 2013 (http://dx.doi.org/10.1016/j.mycmed.2012.11.002)
$Pteronotus (Naked-backed bats)
^Pteronotus parnellii	Yes	Yes	No	mtSSU	Akbar et al. 2012 (doi: 10.1128/AEM.01791-12)
^Pteronotus davyi	No	No	No	NA	Akbar et al. 2012 (doi: 10.1128/AEM.01791-12)
$Pteropus (Fruit bats)
^Pteropus rodricensus	No	No	No	NA	Akbar et al. 2012 (doi: 10.1128/AEM.01791-12)
$Rousettus (Rousette bats)
^Rousettus aegyptiacus	Yes	Yes	No	mtLSU, mtSSU	Akbar et al. 2012 (doi: 10.1128/AEM.01791-12)
$Sturnira (Yellow-shouldered bats)
^Sturnira lilium	Yes	No	No	Amplified mtLSU but not sequenced	Sanches et al. 2009 (http://dx.doi.org/10.1590/S0100-736X2009000600005)
$Tadarida (Frree-tailed bats)
^Tadarida brasiliensis	Yes	Yes	No	mtLSU, mtSSU	Akbar et al. 2012 (doi: 10.1128/AEM.01791-12)
Species Sampled:	Species positive for Pneumocystis:	Genetic data avaialble:	Total microscopy ID only:
37	26	12	0
Genera Sampled:	Species negative for Pneumocystis:	Genetic data unavaialble:
24	11	25

## Sheet: Diprotodontia
Diprotodontia (Kangaroos, Koalas, etc.)			Species Sampled	1/150	Genera Sampled	1/41
	Positive for Pneumocystis	Genetic Sequence Available	Microscopy ID Only	Sequences Collected	Reference
$Macropus (Kangaroos)
^Macropus rufus	Yes	No	Yes	NA	Poelma 1975 (Pneumocystis carinii infections in zoo animals)
Total Genera Sampled:	Species positive for Pneumocystis:	Genetic data available:	Total microscopy ID only:
1	1	0	1
Total Species Sampled:	Species negative for Pneumocystis:	No genetic data:
1	0	1

## Sheet: Didelphimorphia
Didelphimorphia (Possums)			Species Sampled	2/129	Genera Sampled	2/18
	Positive for Pneumocystis	Genetic Sequence Available	Microscopy ID Only	Sequences Collected	Reference
$Didelphis (American opossums)
^Didelphis virginianus	No	No	No	NA	Babb-Biernacki unpublished results
$Marmosa (Mouse opossums)
^Marmosa murina	Yes	Yes	No	mtLSU, mtSSU	Guillot et al. 2001 (Parallel Phylogenies of Pneumocystis Species and their Mammalian Hosts)
Total Genera Sampled:	Species positive for Pneumocystis:	Genetic data available:	Total microscopy ID only:
2	1	1	0
Total Species Sampled:	Species negative for Pneumocystis:	No genetic data:
2	1	1

## Sheet: Eulipotyphla
Eulipotyphla (Shrews, moles, etc.)			Species Sampled	17/564	Genera Sampled	8/61
	Positive for Pneumocystis	Genetic Sequence Available	Microscopy ID Only	Sequences Collected	Reference
$Blarina (Short-tailed shrews)
^Blarina brevicauda	No	No	Yes	NA	Laakonen et al. 1997 (Lung parasites of shrews from Pennsylvania)
$Crocidura (White-toothed shrews)
^Crocidura sualveolens	No	No	Yes	NA	Sebek and Rosicky 1967 (The finding of Pneumocystis carinii in shrews)
$Erinaceus (Hedgehogs)
^Erinaceus europaeus	No	No	Yes	NA	Settnes et al. 1986 (Pneumocystis carinii found in lungs of freeliving animals in denmark)
$Neomys (Eurasian water shrews)
^Neomys fodiens	Yes	No	Yes	NA	Sebek and Rosicky 1967 (The finding of Pneumocystis carinii in shrews)
$Notiosorex (Grey shrews)
^Notiosorex crawfordi	Yes	No	Yes	NA	Laakonen et al. 2001 (https://doi.org/10.7589/0090-3558-37.2.408)
$Sorex (Shrews)
^Sorex alpinus	Yes	No	Yes	NA	Sebek and Rosicky 1967 (The finding of Pneumocystis carinii in shrews)
^Sorex antinorii	Yes	Yes	No	mtLSU, mtSSU, ITS	Danesi et al. 2018 (DOI: 10.1177/1040638718797379)
^Sorex araneus	Yes	Yes	No	mtLSU	Sebek and Rosicky 1967 (The finding of Pneumocystis carinii in shrews), Mazars et al. 1997 (Detection of Pneumocystis in European wild animals), Laakonen et al. 2005 (doi:10.1017/S003118200500931)
^Sorex caecutiens	Yes	No	Yes	NA	Laakkonen et al. 1993 (DOI: 10.7589/0090-3558-29.2.27)
^Sorex cinereus	No	No	Yes	NA	Laakkonen et al. 1997 (Lung parasites of shrews from Pennsylvania)
^Sorex fumeus	No	No	Yes	NA	Laakkonen et al. 1997 (Lung parasites of shrews from Pennsylvania)
^Sorex isodon	Yes	No	Yes	NA	Laakonen 1998 (Pneumocystis carinii in wildlife)
^Sorex minutus	No	No	Yes	NA	Sebek and Rosicky 1967 (The finding of Pneumocystis carinii in shrews)
^Sorex minutissimus	Yes	No	Yes	NA	Laakonen 1998 (Pneumocystis carinii in wildlife)
^Sorex ornatus	Yes	No	Yes	NA	Laakkonen et al. 2001 (https://doi.org/10.7589/0090-3558-37.2.408)
$Suncus (Shrews)
^Suncus murinus	Yes	No	Yes	NA	Cross and Hung 1975 (Latent Pneumocystis carinii infections in some mammals from taipei hsien, taiwan)
$Talpa (Moles)
^Talpa europaea	Yes	Yes	No	mtLSU	Mazars et al. 1997 (Detection of Pneumocystis in European wild animals)
Total Genera Sampled:	Species positive for Pneumocystis:	Genetic data available:	Total microscopy ID only:
8	11	3	14
Total Species Sampled:	Species negative for Pneumocystis:	No genetic data:
17	6	14

## Sheet: Hyracoidea
Hyracoidea (Hyraxes)			Species Sampled	1/6	Genera Sampled	1/3
	Positive for Pneumocystis	Genetic Sequence Available	Microscopy ID Only	Sequences Collected	Reference
$Procavia (Rock hyraxes)
^Procavia ruficeps	Yes	No	Yes	NA	Poelma 1975 (Pneumocystis carinii infections in zoo animals)
Total Genera Sampled:	Species positive for Pneumocystis:	Genetic data available:	Total microscopy ID only:
1	1	0	1
Total Species Sampled:	Species negative for Pneumocystis:	No genetic data:
1	0	1

[truncated: 6 more sheets: Lagomorpha, Monotremata, Perissodactyla, Pilosa, Primates, Scandentia]
