# Supplementary material for: Predicting Species Boundaries and Assessing Undescribed Diversity in Pneumocystis, an Obligate Lung Symbiont
Source: MDPI journal article supplement (doi:10.3390/jof8080799), 2022-07-29
Supplement: s1 [file SupplementaryTable_1.xlsx]

## Sheet: Supplemetary Table 1
Host Identity	mtLSU Accession	mtSSU Accession
Apodemus flavicollis C6	KF384967	KF384921
Apodemus flavicollis PD10	KR704338	KR704347
Apodemus flavicollis PD3	KR704339	KR704346
Apodemus flavicollis PD5	KR704337	KR704348
Apodemus sylvaticus E3	KF384971	KF384929
Apodemus sylvaticus C8	KF384969	KF384923
Apodemus sylvaticus Co2	KF385003	KF384927
Apodemus sylvaticus E4	KF384972	KF384930
Apodemus sylvaticus E5	KF384973	KF384931
Apodemus sylvaticus M4	KF384990	KF384934
Apodemus sylvaticus M12	KF384992	KF384936
Apodemus sylvaticus M23	KF384994	KF384938
Apodemus sylvaticus ME33	KF384979	KF384943
Apodemus sylvaticus PY3	KF384998	KF384940
Apodemus sylvaticus S3	KF384955	KF384913
Apodemus sylvaticus S5	KF384956	KF384914
Artibeus hirsutus	JQ039397	JQ061304
Bandicota indica CLS45	KX257088	KX257150
Bandicota indica CLS50	KX257093	KX257151
Bandicota indica CLS51	KX257093	KX257153
Bandicota indica CLS55	KX257096	KX257152
Bandicota indica CLS56	KX257096	KX257155
Bandicota savilei CLS60	KX257099	KX257156
Bandicota savilei CLS61	KX257100	KX257154
Berylmys berdmorei CLS36	KX257084	KX257144
Berylmys berdmorei CLS37	KX257084	KX257146
Berylmys berdmorei CLS38	KX257084	KX257147
Berylmys berdmorei CLS41	KX257086	KX257143
Berylmys berdmorei CLS42	KX257086	KX257145
Berylmys berdmorei CLS43	KX257086	KX257148
Berylmys berdmorei CLS44	KX257087	KX257149
Callimico goeldi	AF362461	AF395582
Callithrix geoffroyi	AF362456	AF395578
Callithrix jacchus	AF362454	AF395577
Callosciurus finlaysonii	MG766138	MG799832
Canis lupus familiaris	KU985306	KU986906
Cannomys badius	KX257058	KX257127
Cercopithecus hamlyni	AF362457	AF395575
Cercopithecus nictitans	AF362460	AF395576
Ctenodactylus gundi	KX257170	KX257171
Eptescius serotinus	JQ061295	JQ061311
Eulemur macaco	AF362463	AF395585
Felis catus 1	MH818398	MH818401
Felis catus 2	MH818400	MH818403
Glossophaga soricina 1	JQ061303	JQ061305
Glossophaga soricina 2	JQ061297	JQ061305
Leopoldamys herberti CLS10	KX257065	KX257132
Macaca fascicularis	AY265384	AF395574
Macaca mulatta (Chinese)	AF362467	AF395573
Macaca mulatta (Indian)	AF362468	AF395573
Marmosa murina	b	b
Maxomys surifer CLS12	KX257067	KX257132
Mus caroli CLS4	KX257061	KX257128
Mus caroli CLS5	KX257061	KX257129
Mus cervicolor CLS7	KX257062	KX257130
Mus cooki CLS8	KX257063	KX257131
Mus cooki CLS9	KX257064	KX257131
Mustela putorius furo	S42921	From Hunter and Wakefield 1996b
Myocastor coypus	MG799834	MG799835
Myodes glareolus	KR704341	KR704353
Myotis californicus	JQ061300	JQ061318
Niviventer fulvescens CLS14	KX257069	KX257133
Nyctalus noctula	JQ061293	JQ061306
Pipistrellus pipistrellus 1	JQ061294	JQ061309
Pipistrellus pipistrellus 2	JQ061294	JQ061310
Pithecia pithecia	AF362470	AF395583
Plecotus auritus	JQ061296	JQ061307
Pneumocystis carinii JX499145	JX499145	JX499145
Pneumocystis carinii GU133622	GU133622	GU133622
Pneumocystis jirovecii 1	JX855936	JX855936
Pneumocystis jirovecii 2	JX855937	JX855937
Pneumocystis jirovecii 3	JX855938	JX855938
Pneumocystis murina JX499144	JX499144	JX499144
Pneumocystis oryctolagi	S42915	From Hunter and Wakefield 1996b
Pneumocystis wakefieldiae	U20173	From Hunter and Wakefield 1996b
Rattus argentiventer CLS19	KX257074	KX257134
Rattus argentiventer CLS27	KX257077	KX257140
Rattus exulans CLS63	KX257101	KX257164
Rattus exulans CLS64	KX257102	KX257164
Rattus exulans CLS65	KX257102	KX257163
Rattus nitidus CLS67	KX257104	KX257161
Rattus nitidus CLS69	KX257106	KX257160
Rattus nitidus CLS70	KX257107	KX257160
Rattus nitidus CLS82	KX257119	KX257158
Rattus norvegicus CLS22	KX257076	KX257138
Rattus norvegicus CLS23	KX257076	KX257141
Rattus norvegicus CLS24	KX257077	KX257136
Rattus norvegicus CLS25	KX257077	KX257137
Rattus norvegicus CLS26	KX257077	KX257139
Rattus norvegicus CLS28	KX257077	KX257135
Rattus norvegicus CLS71	KX257108	KX257157
Rattus norvegicus CLS72	KX257125	KX257169
Rattus norvegicus CLS73	KX257110	KX257159
Rattus norvegicus CLS74	KX257111	KX257159
Rattus norvegicus CLS98	KX257126	KX257159
Rattus sakeratensis CLS77	KX257114	KX257162
Rattus sakeratensis CLS78	KX257115	KX257165
Rattus sakeratensis CLS80	KX257117	KX257165
Rattus sakeratensis CLS81	KX257118	KX257165
Rattus sakeratensis CLS83	KX257119	KX257162
Rattus sakeratensis CLS84	KX257119	KX257165
Rattus sakeratensis CLS94	KX257125	KX257165
Rattus sakeratensis CLS95	KX257125	KX257166
Rattus tanezumi CLS31	KX257079	KX257142
Rattus tanezumi CLS75	KX257112	KX257168
Rattus tanezumi CLS76	KX257113	KX257169
Rattus tanezumi CLS85	KX257119	KX257168
Rattus tanezumi CLS87	KX257120	KX257159
Rattus tanezumi CLS88	KX257121	KX257167
Rattus tanezumi CLS89	KX257121	KX257169
Rattus tanezumi CLS90	KX257122	KX257167
Rattus tanezumi CLS93	KX257125	KX257158
Rattus tanezumi CLS96	KX257125	KX257169
Rousettus aegyptiacus 1	JQ061301	JQ061316
Rousettus aegyptiacus 2	JQ061302	JQ061317
Saguinus fuscicollis	AF362462	AF395580
Saguinus midas	AF362455	AF395579
Saguinus oedipus	AF362453	AF395581
Saimiri sciureus	AF362458	AF395583
Sciurus aestuans	KF411466	KF384953
Sorex antinorii PD27	KR704344	KR704349
Sorex antinorii PD66	KR704343	KR704350
Sus scrofa domesticus 1	KC511585	KC454434
Sus scrofa domesticus 2	KC511584	KC454437
Tadarida brasiliensis 1	JQ061298	JQ061313
Tadarida brasiliensis 2	JQ061298	JQ061315
Tadarida brasiliensis 3	JQ061299	JQ061314
aMentioned in: Guillot J, Demanche C, Hugot JP, Berthelemy M, Wakefield AE, Dei-Cas E, Chermette R. 2001. Paralllel phylogenies of Pneumocystis species and their mammal hosts. Journal of Eukaryotic Microbiology. 48:113s–115s. Not on GenBank. Authors sent us this sequence upon request.
bHunter JA, Wakefield AE. 1996. Genetic divergence at the mitochondrial small subunit ribosomal RNA gene among isolates of Pneumocystis carinii from five mammalian host species. Journal of Eukaryotic Microbiology. 43:24S–25S.
